# Supplementary material
Source: HighWire-hosted journal article supplement (https://bmjopen.bmj.com/content/10/8/e035879)
Supplement: inline-supplementary-material-1 [file inline-supplementary-material-1.pdf]

## Supplementary file 1: PRISMA-P 2015 Checklist

| Section/topic                                                                                            | #  | Checklist item                                                                                                                                                                                  | Information reported                |                                     | Line number(s)                                      |
|----------------------------------------------------------------------------------------------------------|----|-------------------------------------------------------------------------------------------------------------------------------------------------------------------------------------------------|-------------------------------------|-------------------------------------|-----------------------------------------------------|
|                                                                                                          |    |                                                                                                                                                                                                 | Yes                                 | No                                  |                                                     |
| <b>ADMINISTRATIVE INFORMATION</b>                                                                        |    |                                                                                                                                                                                                 |                                     |                                     |                                                     |
| <b>Title:</b> Mapping Evidence of Food Safety at Transport stations in Africa: A Scoping Review Protocol |    |                                                                                                                                                                                                 |                                     |                                     |                                                     |
| Identification                                                                                           | 1a | Identify the report as a protocol of a systematic review                                                                                                                                        | <input checked="" type="checkbox"/> | <input type="checkbox"/>            | 2                                                   |
| Update                                                                                                   | 1b | If the protocol is for an update of a previous systematic review, identify as such                                                                                                              | <input type="checkbox"/>            | <input checked="" type="checkbox"/> |                                                     |
| <b>Registration</b>                                                                                      | 2  | If registered, provide the name of the registry (e.g., PROSPERO) and registration number in the Abstract                                                                                        | <input type="checkbox"/>            | <input checked="" type="checkbox"/> | Not applicable. This is a systematic scoping review |
| <b>Authors</b>                                                                                           |    |                                                                                                                                                                                                 |                                     |                                     |                                                     |
| Contact                                                                                                  | 3a | Provide name, institutional affiliation, and e-mail address of all protocol authors; provide physical mailing address of corresponding author                                                   | <input checked="" type="checkbox"/> | <input type="checkbox"/>            | 6 to 16                                             |
| Contributions                                                                                            | 3b | Describe contributions of protocol authors and identify the guarantor of the review                                                                                                             | <input checked="" type="checkbox"/> | <input type="checkbox"/>            | 244 to 246                                          |
| <b>Amendments</b>                                                                                        | 4  | If the protocol represents an amendment of a previously completed or published protocol, identify as such and list changes; otherwise, state plan for documenting important protocol amendments | <input type="checkbox"/>            | <input checked="" type="checkbox"/> |                                                     |
| <b>Support</b>                                                                                           |    |                                                                                                                                                                                                 |                                     |                                     |                                                     |
| Sources                                                                                                  | 5a | Indicate sources of financial or other support for the review                                                                                                                                   | <input checked="" type="checkbox"/> | <input type="checkbox"/>            | 249-251                                             |
| Sponsor                                                                                                  | 5b | Provide name for the review funder and/or sponsor                                                                                                                                               | <input checked="" type="checkbox"/> | <input type="checkbox"/>            | 249-251                                             |
| Role of sponsor/funder                                                                                   | 5c | Describe roles of funder(s), sponsor(s), and/or institution(s), if any, in developing the protocol                                                                                              | <input checked="" type="checkbox"/> | <input type="checkbox"/>            | 249-252                                             |
| <b>INTRODUCTION</b>                                                                                      |    |                                                                                                                                                                                                 |                                     |                                     |                                                     |

| Section/topic                  | #   | Checklist item                                                                                                                                                                                                            | Information reported                |                          | Line number(s)       |
|--------------------------------|-----|---------------------------------------------------------------------------------------------------------------------------------------------------------------------------------------------------------------------------|-------------------------------------|--------------------------|----------------------|
|                                |     |                                                                                                                                                                                                                           | Yes                                 | No                       |                      |
| <b>Rationale</b>               | 6   | Describe the rationale for the review in the context of what is already known                                                                                                                                             | <input checked="" type="checkbox"/> | <input type="checkbox"/> | 112-124              |
| <b>Objectives</b>              | 7   | Provide an explicit statement of the question(s) the review will address with reference to participants, interventions, comparators, and outcomes (PCC)                                                                   | <input checked="" type="checkbox"/> | <input type="checkbox"/> | 124-126              |
| <b>METHODS</b>                 |     |                                                                                                                                                                                                                           |                                     |                          |                      |
| <b>Eligibility criteria</b>    | 8   | Specify the study characteristics (e.g., PICO, study design, setting, time frame) and report characteristics (e.g., years considered, language, publication status) to be used as criteria for eligibility for the review | <input checked="" type="checkbox"/> | <input type="checkbox"/> | 143-146 and Table 1  |
| <b>Information sources</b>     | 9   | Describe all intended information sources (e.g., electronic databases, contact with study authors, trial registers, or other grey literature sources) with planned dates of coverage                                      | <input checked="" type="checkbox"/> | <input type="checkbox"/> | 149-150              |
| <b>Search strategy</b>         | 10  | Present draft of search strategy to be used for at least one electronic database, including planned limits, such that it could be repeated                                                                                | <input checked="" type="checkbox"/> | <input type="checkbox"/> | Table 2              |
| <b>STUDY RECORDS</b>           |     |                                                                                                                                                                                                                           |                                     |                          |                      |
| <b>Data management</b>         | 11a | Describe the mechanism(s) that will be used to manage records and data throughout the review                                                                                                                              | <input type="checkbox"/>            | <input type="checkbox"/> | 199-201 and Figure 1 |
| <b>Selection process</b>       | 11b | State the process that will be used for selecting studies (e.g., two independent reviewers) through each phase of the review (i.e., screening, eligibility, and inclusion in meta-analysis)                               | <input checked="" type="checkbox"/> | <input type="checkbox"/> | 188-196              |
| <b>Data collection process</b> | 11c | Describe planned method of extracting data from reports (e.g., piloting forms, done independently, in duplicate), any processes for obtaining and confirming data from investigators                                      | <input checked="" type="checkbox"/> | <input type="checkbox"/> | 203-209              |
| <b>Data items</b>              | 12  | List and define all variables for which data                                                                                                                                                                              | <input checked="" type="checkbox"/> | <input type="checkbox"/> | Table 3              |

| Section/topic                                                     | #   | Checklist item                                                                                                                                                                                                                              | Information reported                |                                     | Line number(s) |
|-------------------------------------------------------------------|-----|---------------------------------------------------------------------------------------------------------------------------------------------------------------------------------------------------------------------------------------------|-------------------------------------|-------------------------------------|----------------|
|                                                                   |     |                                                                                                                                                                                                                                             | Yes                                 | No                                  |                |
|                                                                   |     | will be sought (e.g., PICO items, funding sources), any pre-planned data assumptions and simplifications                                                                                                                                    |                                     |                                     |                |
| <b>Outcomes and prioritization</b>                                | 13  | List and define all outcomes for which data will be sought, including prioritization of main and additional outcomes, with rationale                                                                                                        | <input checked="" type="checkbox"/> | <input type="checkbox"/>            | Table 3        |
| <b>Risk of bias in individual studies</b>                         | 14  | Describe anticipated methods for assessing risk of bias of individual studies, including whether this will be done at the outcome or study level, or both; state how this information will be used in data synthesis                        | <input type="checkbox"/>            | <input checked="" type="checkbox"/> | Not applicable |
| <b>DATA:</b> A narrative approach will be used to present results |     |                                                                                                                                                                                                                                             |                                     |                                     |                |
| <b>Synthesis</b>                                                  | 15a | Describe criteria under which study data will be quantitatively synthesized                                                                                                                                                                 | <input type="checkbox"/>            | <input checked="" type="checkbox"/> | Not applicable |
|                                                                   | 15b | If data are appropriate for quantitative synthesis, describe planned summary measures, methods of handling data, and methods of combining data from studies, including any planned exploration of consistency (e.g., $I^2$ , Kendall's tau) | <input type="checkbox"/>            | <input checked="" type="checkbox"/> | Not applicable |
|                                                                   | 15c | Describe any proposed additional analyses (e.g., sensitivity or subgroup analyses, meta-regression)                                                                                                                                         | <input type="checkbox"/>            | <input checked="" type="checkbox"/> | Not applicable |
|                                                                   | 15d | If quantitative synthesis is not appropriate, describe the type of summary planned                                                                                                                                                          | <input type="checkbox"/>            | <input checked="" type="checkbox"/> | Not applicable |
| <b>Meta-bias(es)</b>                                              | 16  | Specify any planned assessment of meta-bias(es) (e.g., publication bias across studies, selective reporting within studies)                                                                                                                 | <input type="checkbox"/>            | <input checked="" type="checkbox"/> | Not applicable |
| <b>Confidence in cumulative evidence</b>                          | 17  | Describe how the strength of the body of evidence will be assessed (e.g., GRADE)                                                                                                                                                            | <input type="checkbox"/>            | <input checked="" type="checkbox"/> | Not applicable |
